# Supplementary material
Source: Springer Nature journal article supplement (https://www.springermedizin.de/resource/supplementary/12913_2012_2528_MOESM2_ESM.pdf/9532096)

## Prehospital team competence

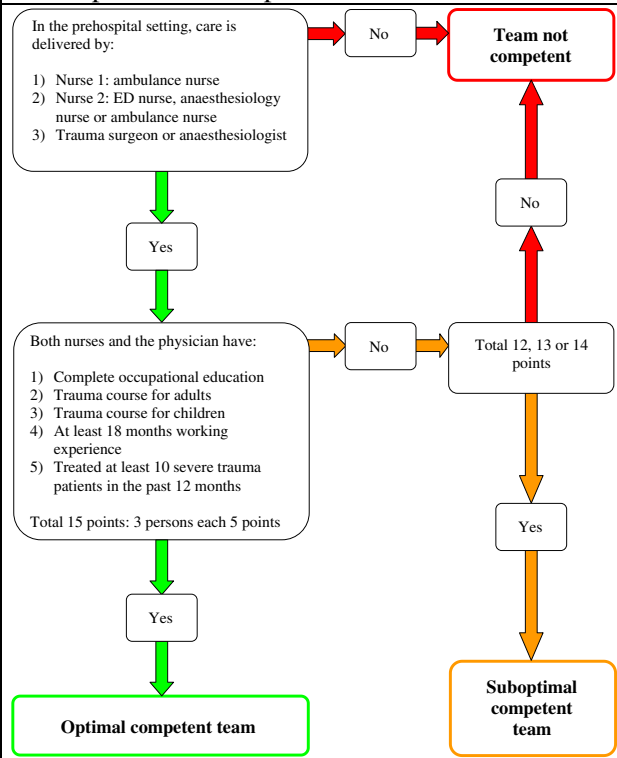

## Emergency department team competence

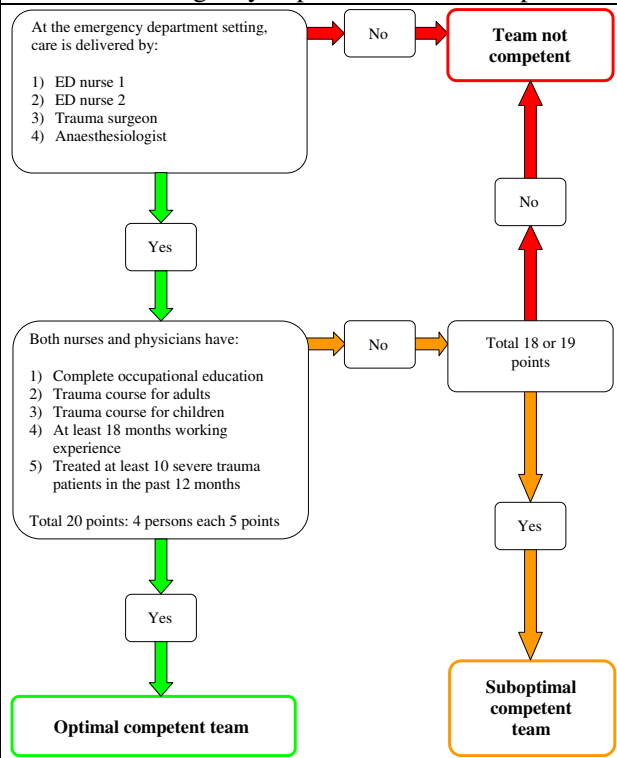

Supplement: MOESM2 [file 9532096]
